# Supplementary material
Source: MDPI journal article supplement (https://www.mdpi.com/2225-1154/8/9/97)
Supplement: s1 [file s1]

## 1. Agricultural Production

### 1.1. Major crops grown in the woreda

| No. | Subsistent crop |           | Cash crop |           |
|-----|-----------------|-----------|-----------|-----------|
|     | Annual          | Perennial | Annual    | Perennial |
|     |                 |           |           |           |
|     |                 |           |           |           |
|     |                 |           |           |           |
|     |                 |           |           |           |
|     |                 |           |           |           |
|     |                 |           |           |           |
|     |                 |           |           |           |
|     |                 |           |           |           |

### 1.2. Major crops grown and average yield in each cropping seasons

| No. | Name of crop | Major cropping seasons |                  |          |                  |
|-----|--------------|------------------------|------------------|----------|------------------|
|     |              | Meher (✓)              | Yield in quintal | Belg (✓) | Yield in quintal |
|     |              |                        |                  |          |                  |
|     |              |                        |                  |          |                  |
|     |              |                        |                  |          |                  |

### 1.3. Cropping calendar

| No | Name of crop | Cropping seasons |         |          |             |         |         |          |             |
|----|--------------|------------------|---------|----------|-------------|---------|---------|----------|-------------|
|    |              | Meher            |         |          |             | Belg    |         |          |             |
|    |              | Plowing          | Sowin g | Weedin g | Harvestin g | Plowing | Sowin g | Weedin g | Harvestin g |
|    |              |                  |         |          |             |         |         |          |             |
|    |              |                  |         |          |             |         |         |          |             |
|    |              |                  |         |          |             |         |         |          |             |

### 1.4. Cultivated land allocation

| No. | Cropping seasons    | Cultivated land in hectare |
|-----|---------------------|----------------------------|
| 1   | Belg                |                            |
| 2   | Meher               |                            |
| 3   | Both Belg and Meher |                            |
| 4   | Perennial crops     |                            |

|   |                       |  |
|---|-----------------------|--|
| 5 | Total cultivated land |  |
|---|-----------------------|--|

1.5. The dominant type of soils found in the woreda and its coverage in percent

|    | <u>Type of soil</u> | <u>Coverage in percent</u> |
|----|---------------------|----------------------------|
| 1. | -----               | -----                      |
| 2. | -----               | -----                      |
| 3. | -----               | -----                      |

**2. Natural resources**

2.1. The size of **natural forest** found in the woreda along with its primary tree species composition:

- Area -----
- Major tree species -----
- 

2.2. The size and species of **plantation forest** found in the woreda:

- State forest: Area-----, dominant tree species-----
- Community forest: Area-----, dominant tree species-----
- Private forest: Area-----, dominant tree species-----

2.3. The name and area of **protected forest** found in the woreda: name-----, total area coverage-----

2.4. The number of forest nursery located in the woreda:

1. Government -----
2. Community -----
3. NGO -----
4. Others -----

2.5. Distribution of farmland size, in percent, per household:

| No. | Farmland size  | Percentage of landowners |
|-----|----------------|--------------------------|
| 1   | Below, 0.5 ha. |                          |
| 2   | 0.5-1.0 ha.    |                          |
| 3   | 1.0-1.5 ha.    |                          |

|   |               |  |
|---|---------------|--|
| 4 | 1.5 – 2.0 ha. |  |
| 5 | 2.0 – 2.5 ha  |  |
| 6 | 2.5 – 3.0 ha  |  |
| 7 | Above 3.0 ha. |  |

2.6. Average farm land size (ha) \_\_\_\_\_

2.7. Total area of the woreda \_\_\_\_\_ hectare

2.8. Total number of kebeles in the woreda \_\_\_\_\_

2.9. The number of identified watersheds \_\_\_\_\_

2.10. Altitude range of the woreda from \_\_\_\_\_ to \_\_\_\_\_, average \_\_\_\_\_

2.11. Mean annual rainfall \_\_\_\_\_

2.12. Temperature: Maximum \_\_\_\_\_ minimum \_\_\_\_\_ mean \_\_\_\_\_

2.13. Land slope class area in percentage:

1. Flat or almost flat 0-3% slope \_\_\_\_\_%
2. Gently sloping 3-8% slope \_\_\_\_\_%
3. Sloping 8-15% slope \_\_\_\_\_%
4. Moderately steeply 15- 30% slope \_\_\_\_\_%
5. Steeply 30-50% slope \_\_\_\_\_%
6. Very steeply greater than 50% slope \_\_\_\_\_%

2.14. Agro-ecological zone in percentage

1. Kola \_\_\_\_\_%
2. Woina dega \_\_\_\_\_%
3. Dega \_\_\_\_\_%

4. Wurch \_\_\_\_\_%

2.15. Major land use pattern in the woreda

- Agricultural land: area in (ha) \_\_\_\_\_ percent \_\_\_\_\_
- Forest land: area in (ha) \_\_\_\_\_ percent \_\_\_\_\_
- Grazing land: area in (ha) \_\_\_\_\_ percent \_\_\_\_\_
- Wet land: area in (ha) \_\_\_\_\_ percent \_\_\_\_\_
- Degraded land: area in (ha) \_\_\_\_\_ percent \_\_\_\_\_
- Settlement: area in (ha) \_\_\_\_\_ percent \_\_\_\_\_
- Others: area in (ha) \_\_\_\_\_ percent \_\_\_\_\_

### 3. Service Institution

The number of agricultural input supply organizations found in the woreda

- Public -----
- Farmer's cooperatives/unions -----
- Others -----





#### 4. Water Supply

##### 4.1. Sources of water for domestic use and agriculture

| No. | Source of water        | Beneficiaries of different water sources for domestic and agricultural purpose in % |                  |          |           |            |       |
|-----|------------------------|-------------------------------------------------------------------------------------|------------------|----------|-----------|------------|-------|
|     |                        | Drinking                                                                            | Food preparation | Cleaning | Livestock | Irrigation | Total |
| 1   | River                  |                                                                                     |                  |          |           |            |       |
| 2   | Developed spring       |                                                                                     |                  |          |           |            |       |
| 3   | Undeveloped spring     |                                                                                     |                  |          |           |            |       |
| 4   | Pond                   |                                                                                     |                  |          |           |            |       |
| 5   | Hand-dug well          |                                                                                     |                  |          |           |            |       |
| 6   | Rural pipe system(RPS) |                                                                                     |                  |          |           |            |       |
| 7   | Motorized              |                                                                                     |                  |          |           |            |       |
| 8   | Others                 |                                                                                     |                  |          |           |            |       |

| No. | Woreda | Types of Water Schemes |                |               |               |
|-----|--------|------------------------|----------------|---------------|---------------|
|     |        | Spring development     | Hand-dug wells | Shallow wells | Beneficiaries |
|     |        |                        |                |               |               |





## 5. Irrigation

### 5.1. Irrigation Performance

| No. | Type of irrigation | Irrigation Potential (ha) | Total irrigated land (ha) | Number of beneficiary households |        |       | Average irrigated land holding per household | Major crops grown under irrigation |
|-----|--------------------|---------------------------|---------------------------|----------------------------------|--------|-------|----------------------------------------------|------------------------------------|
|     |                    |                           |                           | Male                             | Female | Total |                                              |                                    |
| 1   | Traditional        |                           |                           |                                  |        |       |                                              |                                    |
| 2   | Small scale        |                           |                           |                                  |        |       |                                              |                                    |
| 3   | Medium-scale       |                           |                           |                                  |        |       |                                              |                                    |
| 4   | Large scale        |                           |                           |                                  |        |       |                                              |                                    |

### 5.2. Yield of major crops grown under irrigation

|    | <u>Primary Crops</u> | <u>Yield/ha</u> |
|----|----------------------|-----------------|
| 1. | -----                | -----           |
| 2. | -----                | -----           |
| 3. | -----                | -----           |

5.3. The number of **permanent** rivers found in the woreda and, if possible, its discharge potential along with its name

|    | <u>Name of river</u> | <u>Flow potential (m<sup>3</sup>/s)</u> |
|----|----------------------|-----------------------------------------|
| 1. | -----                | -----                                   |
| 2. | -----                | -----                                   |

5.4. The number of **seasonal** rivers, its flow period, flow potential and name

|    | <u>Name of river</u> | <u>Flow period</u> | <u>Flow potential (m<sup>3</sup>/s)</u> |
|----|----------------------|--------------------|-----------------------------------------|
| 1. | -----                | -----              | -----                                   |
| 2. | -----                | -----              | -----                                   |

**6. Significant problems and strategic issues**

6.1. Major development problems of the sector

- -----
- -----
- -----
- -----
- -----
- -----
- -----
- -----
- -----
- -----

6.2. Key strategic issues in the sector

- -----
- -----
- -----
- -----
- -----
- -----
- -----

**Table 1: Traditional Irrigation performance of Angar basin at farmer level (Source; Office of woredas irrigation development)**

| Woredas (villages) | Types of irrigation | Irrigation potential (ha) | Total irrigated land | No. of beneficiary households |        |       | Ave. irrigated land holding per household(ha) | Major crops grown under irrigation                |
|--------------------|---------------------|---------------------------|----------------------|-------------------------------|--------|-------|-----------------------------------------------|---------------------------------------------------|
|                    |                     |                           |                      | Male                          | female | Total |                                               |                                                   |
| Abbay Dengoro      | Traditional         | 8409                      | 3964                 | 8928                          | 466    | 9394  | 0.5                                           | Potato, onion, tomato, Gr/papper, cabbage, maize  |
|                    | Small scale         |                           |                      |                               |        |       |                                               |                                                   |
|                    | Mid&large           |                           |                      |                               |        |       |                                               |                                                   |
| Amuru              | Traditional         | 2476                      | 2015                 | 2740                          | 396    | 3136  | 0.6                                           | Potato, tomato. Gr.peper, tomato                  |
|                    | Small scale         | 936                       | 36                   | 145                           | 59     | 204   | 0.2                                           |                                                   |
|                    | Mid&large           |                           |                      |                               |        |       |                                               |                                                   |
| Ebantu             | Traditional         | 3404                      | 2773                 | 4205                          | 275    | 4480  | 0.6                                           | Potato, onion, tomato and maize                   |
|                    | Small scale         | -                         | -                    | -                             | -      | -     | -                                             |                                                   |
|                    | Mid&large           | -                         | -                    | -                             | -      | -     | -                                             |                                                   |
| Gida Ayana         | Traditional         | 3909                      | 3875                 | 9107                          | 116    | 9223  | 0.42                                          | Onion, tomato, maize, potato, cabbage, carrot etc |
|                    | Small scale         | 25                        | 25                   | 186                           | 14     | 200   | 0.125                                         |                                                   |
|                    | Mid&large           |                           |                      |                               |        |       |                                               |                                                   |
| Kiramuru           | Traditional         | 2304                      | 1309                 | 3953                          | 507    | 4460  | 0.25                                          | Potato, tomato, onion etc                         |
|                    | Small scale         | 2304                      | 1309                 | 3953                          | 507    | 4460  | 0.25                                          |                                                   |
|                    | Mid&large           | -                         | -                    | -                             | -      | -     | -                                             |                                                   |
| Gobu Sayo          | Traditional         | 674                       | 637                  | 2019                          | 225    | 2244  | 0.28                                          | Onion ,tomato etc                                 |
|                    | Small scale         | -                         | -                    | -                             | -      | -     | -                                             |                                                   |
|                    | Mid&large           | 263                       | 246.25               | 637                           | 120    | 757   | 0.35                                          |                                                   |
| Gudeya Bila        | Traditional         | 4240.5                    | 3369                 | 3940                          | 985    | 4925  | 0.25-1                                        | Potato and maize                                  |
|                    | Small scale         | 40                        | 36                   | 125                           | 77     | 202   | 0.25                                          |                                                   |
|                    | Mid&large           | -                         | -                    | -                             | -      | -     | -                                             |                                                   |

|                        |                        |                                 |                            |                                  |        |       |                                                        |                                                                                    |
|------------------------|------------------------|---------------------------------|----------------------------|----------------------------------|--------|-------|--------------------------------------------------------|------------------------------------------------------------------------------------|
| Guto Gida              | Traditional            | -                               | 5165.5                     | 6554                             | 760    | 7314  |                                                        | Maize,potato,tomato,onion,ca<br>rrot,cabage                                        |
|                        | Small scale            | -                               | 184                        | 253                              | 25     | 278   |                                                        |                                                                                    |
|                        | Mid&large              | -                               | -                          | -                                | -      | -     | -                                                      |                                                                                    |
| Horro                  | Traditional            | 4127                            | 3987                       | 7337                             | 2290   | 9621  | 0.25                                                   | onion, potato, tomato, garlic,<br>beetroot                                         |
|                        | Small scale            | 294                             | 56                         | 123                              | 77     | 196   | 0.5                                                    |                                                                                    |
|                        | Mid&large              |                                 |                            |                                  |        |       |                                                        |                                                                                    |
| Woredas                | Types of<br>irrigation | Irrigation<br>potential<br>(ha) | Total<br>irrigated<br>land | No. of beneficiary<br>households |        |       | Ave.<br>irrigated land<br>holding per<br>hose hold(ha) | Major crops grown under<br>irrigation                                              |
|                        |                        |                                 |                            | Male                             | female | Total |                                                        |                                                                                    |
| Jardega<br>Jarte       | Traditional            | 1965                            | 1900                       | 5252                             | 1748   | 7600  | 0.25                                                   | potato,tomato.onion                                                                |
|                        | Small scale            | 4256                            | 4180                       | 6970                             | 1390   | 8360  | 0.167                                                  |                                                                                    |
|                        | Mid&large              | -                               | -                          | -                                | -      | -     | -                                                      |                                                                                    |
| Jima<br>Geneti         | Traditional            | 8973                            | 6737                       | 10427                            | 1788   | 12215 | 0.25                                                   | maize,tomato,potato,papper<br>barely ,onion etc                                    |
|                        | Small scale            | 360                             | 51                         | 88                               | 16     | 104   | 0.125                                                  |                                                                                    |
|                        | Mid&large              | -                               | -                          | -                                | -      | -     | -                                                      |                                                                                    |
| Limu                   | Traditional            | 3570                            | 5793                       | 6043                             | 1097   | 7140  | 0.25                                                   | Maize,tomato,potato,papper<br>etc                                                  |
|                        | Small scale            | -                               | -                          | -                                | -      | -     | -                                                      |                                                                                    |
|                        | Mid&large              | -                               | -                          | -                                | -      | -     | -                                                      |                                                                                    |
| Haro<br>Limu           | Traditional            | 3241                            | 2302.25                    | 5136                             | 555    | 5691  | 0.4                                                    | Onion, tomato, maize, potato,<br>cabbage, beet root,etc                            |
|                        | Small scale            |                                 |                            |                                  |        |       |                                                        |                                                                                    |
|                        | Mid&large              | -                               | -                          | -                                | -      | -     | -                                                      |                                                                                    |
| Blao<br>Gegainfid<br>o | Traditional            |                                 |                            |                                  |        |       |                                                        | Data Not available                                                                 |
|                        | Small scale            |                                 |                            |                                  |        |       |                                                        |                                                                                    |
|                        | Mid&large              |                                 |                            |                                  |        |       |                                                        |                                                                                    |
| Sasiga                 | Traditional            | 7856                            | 3975                       | 8011                             | 693    | 8704  | 0.75                                                   | Cereal crops, root and tuber<br>crops, vegetable crops, fruit<br>crops, and others |
|                        | Small scale            | 1234                            | 570                        | 2897                             | 110    | 3007  | 0.25                                                   |                                                                                    |
|                        | Wet land               | 1650                            | 1150                       | 1580                             | 144    | 1724  | 0.25                                                   |                                                                                    |

|                |             |      |      |      |      |       |       |                                                      |
|----------------|-------------|------|------|------|------|-------|-------|------------------------------------------------------|
| Waheyu<br>Tuka | Traditional | 6840 | 6840 | 9927 | 1314 | 11241 | 0.25  | Maize,tomato,potato,papper<br>etc                    |
|                | Small scale | 279  | 279  | 326  | 78   | 404   | 0.25  |                                                      |
|                | Mid&large   | 97   | 97   | 121  | 16   | 137   | 0.25  |                                                      |
| Sibu Sire      | Traditional | 7500 | 6823 | 7000 | 1128 | 8128  | 0.839 | Onion, tomato, maize, potato,<br>cabbage, carrot etc |
|                | Small scale | 250  | 200  | 460  | 155  | 615   | 0.325 |                                                      |
|                | Mid&large   | -    | -    | -    | -    | -     | -     |                                                      |
